# Supplementary material
Source: PubMed Central journal article supplement (PMC2638505)
Supplement: NIHMS64905-supplement-2.pdf [file NIHMS64905-supplement-2.pdf]

**Supplementary Table S1. Analysis of Shh-induced medulloblastomas in mice after systemic antibody treatment**

|                                | <b>L2G7</b>    | <b>5G8</b>     | <b><i>P</i> value</b> |
|--------------------------------|----------------|----------------|-----------------------|
| Tumor incidence (3 months)     | 20 of 48 (42%) | 22 of 49 (45%) | 0.9                   |
| Tumor size (mm <sup>2</sup> )* | 4.9            | 4.3            | 0.8                   |
| Proliferation index (%)*       | 18             | 20             | 0.4                   |
| Apoptotic index (%)*           | 1.3            | 1.5            | 0.4                   |

\* Mean values
